# Supplementary material for: Application of a Zn(ii) based metal–organic framework as an efficient solid-phase extraction sorbent for preconcentration of plasticizer compounds
Source: Royal Society of Chemistry journal article supplement (doi:10.1039/c6ra06560k), 2016-01-01
Supplement: c6ra06560k1.pdf [file c6ra06560k1.pdf]

## Supplementary Information

### **Application of a Zn(II) based metal-organic framework as an efficient solid-phase extraction sorbent for preconcentration of plasticizer compounds**

Elham Tahmasebi, Mohammad Yaser Masoomi, Yadollah Yamini and Ali Morsali\*

Department of Chemistry, Faculty of Sciences, Tarbiat Modares University, Tehran,  
Islamic Republic of Iran

Email: [Morsali\\_a@modares.ac.ir](mailto:Morsali_a@modares.ac.ir), [Morsali\\_a@yahoo.com](mailto:Morsali_a@yahoo.com)

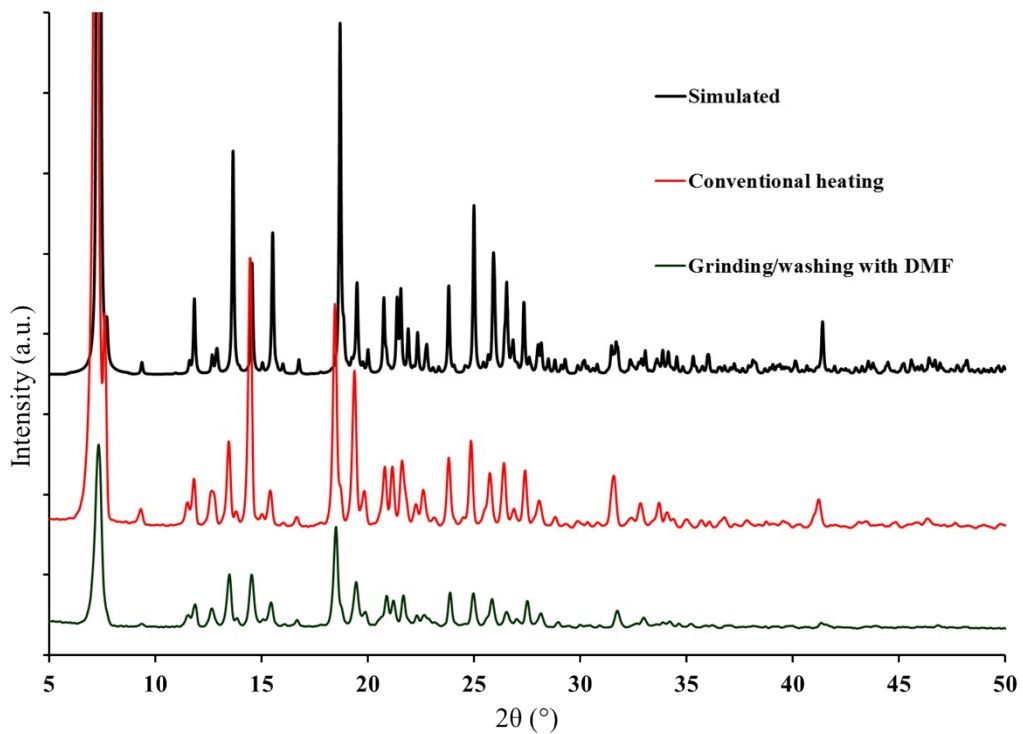

Fig. S1. Comparison of PXR D for TMU-6: simulated; solvothermal synthesis; mechanothesized after washing with DMF.

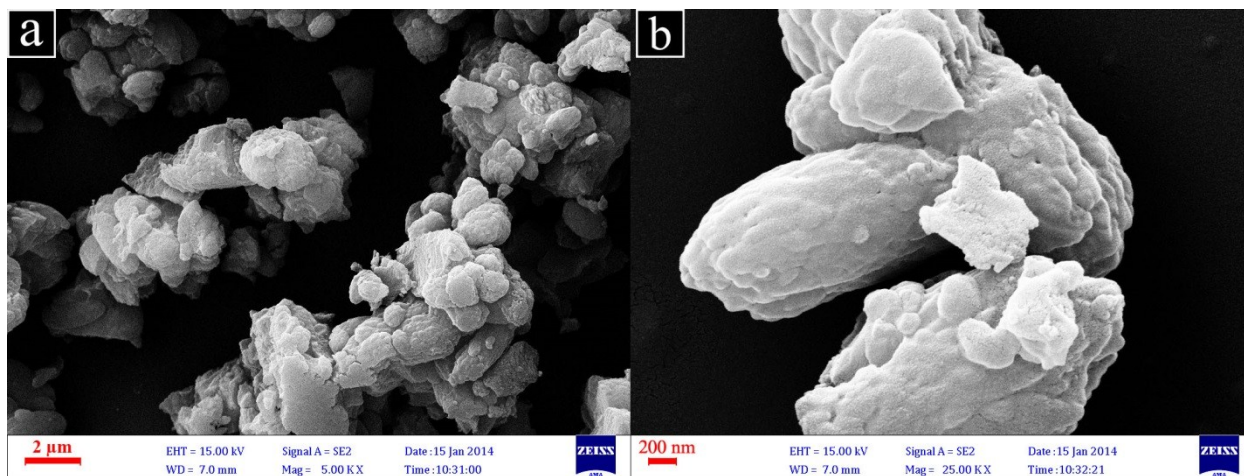

Fig. S2. (a) and (b), FE-SEM images of TMU-6 synthesized by mechanochemical reaction.

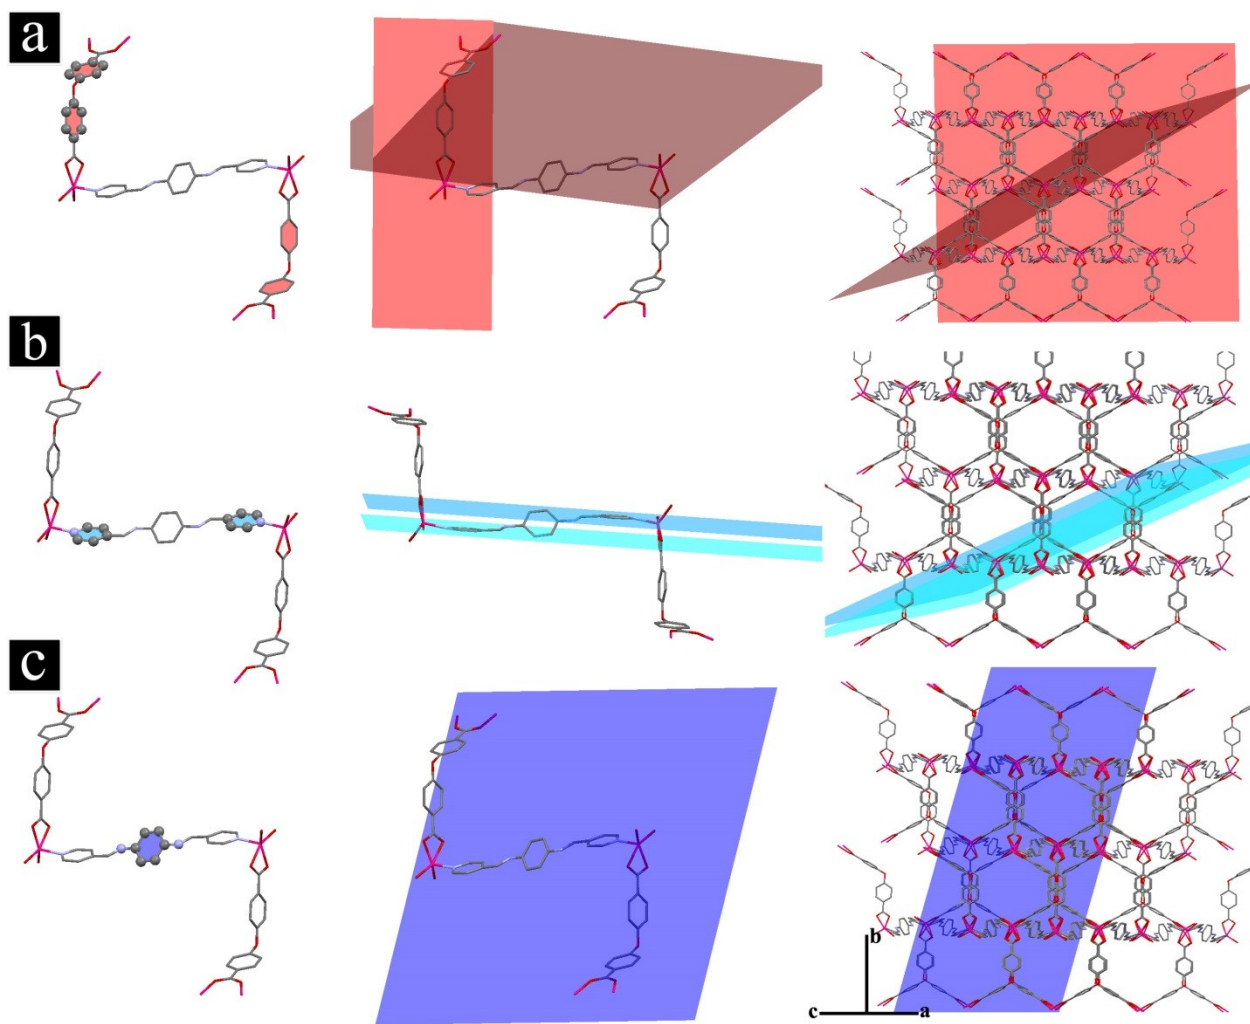

Fig. S3. Representation of phenyl rings of (a) oba and (b and c) 4-bpmb ligands in the pore walls of TMU-6.

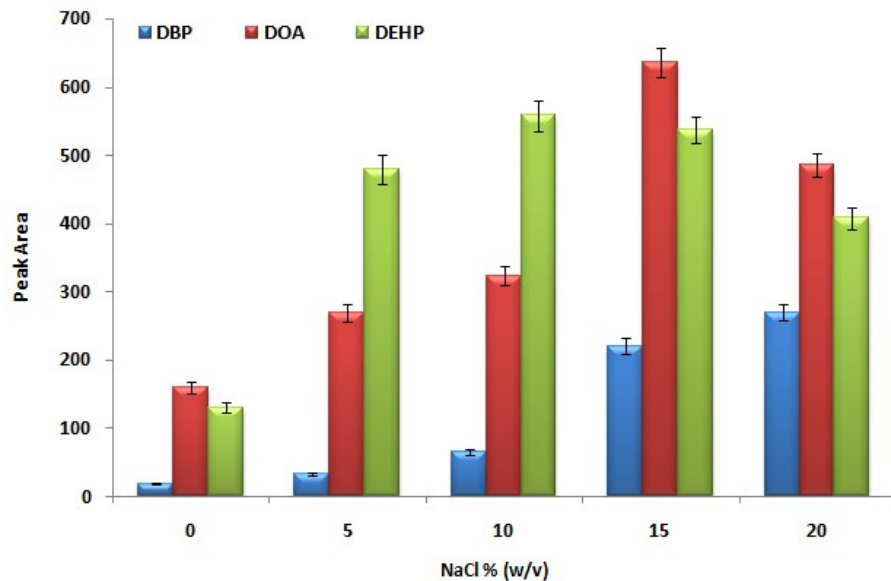

Fig.S4. Effect of NaCl concentration on extraction efficiency. Extraction conditions: sample solution, 30 mL of 100  $\mu\text{g L}^{-1}$  of target analytes; MOF, 4 mg; eluent, 100  $\mu\text{L}$  of ethyl acetate; extraction time, 5 min; desorption time, 1 min.

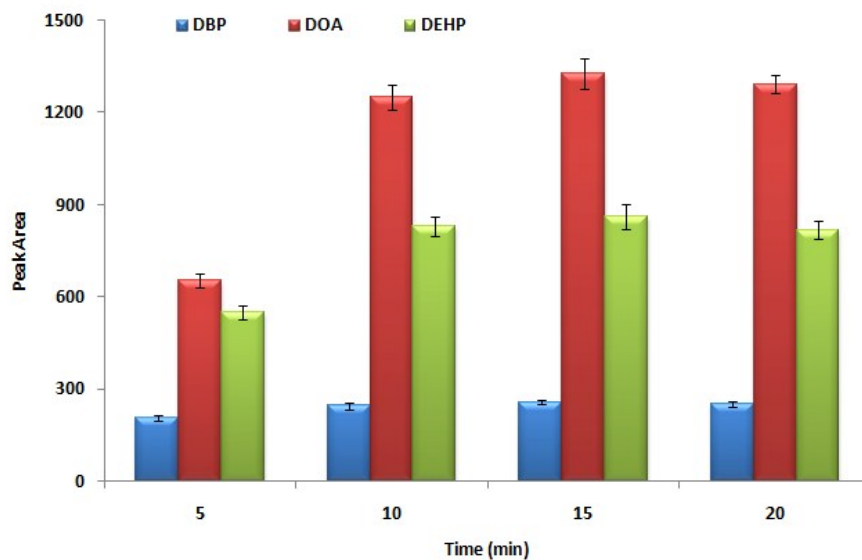

Fig.S5. Effect of extraction time on extraction efficiency. Extraction conditions: sample solution, 30 mL of  $100 \mu\text{g L}^{-1}$  of target analytes and 15% (w/v) NaCl; MOF, 4 mg; eluent, 100  $\mu\text{L}$  of ethyl acetate; desorption time, 1 min.

**Table S1.** Experimental factors, levels and matrix of the orthogonal and rotatable centered central composite design for determination of plasticizers by the proposed SPE method.

| Factors                  | Symbol | Levels    |     |     |     |           |
|--------------------------|--------|-----------|-----|-----|-----|-----------|
|                          |        | $-\alpha$ | -1  | 0   | +1  | $+\alpha$ |
| Adsorbent amount (mg)    | A      | 3.0       | 4.0 | 5.5 | 7.0 | 8.0       |
| Sample volume (mL)       | B      | 50        | 70  | 100 | 130 | 150       |
| Eluent volume ( $\mu$ L) | C      | 99        | 140 | 200 | 260 | 301       |

  

| Run | A   | B   | C   | Response |
|-----|-----|-----|-----|----------|
| 1   | 5.5 | 50  | 200 | 48.4     |
| 2   | 4.0 | 70  | 260 | 12.6     |
| 3   | 5.5 | 100 | 200 | 32.5     |
| 4   | 5.5 | 100 | 200 | 30.0     |
| 5   | 5.5 | 100 | 200 | 28.5     |
| 6   | 5.5 | 100 | 200 | 30.9     |
| 7   | 5.5 | 100 | 200 | 35.7     |
| 8   | 5.5 | 100 | 200 | 27.4     |
| 9   | 8.0 | 100 | 200 | 51.6     |
| 10  | 5.5 | 100 | 301 | 29.5     |
| 11  | 5.5 | 150 | 200 | 4.0      |
| 12  | 3.0 | 100 | 200 | 19.9     |
| 13  | 4.0 | 130 | 140 | 13.2     |
| 14  | 7.0 | 70  | 260 | 39.9     |
| 15  | 7.0 | 130 | 140 | 26.2     |
| 16  | 4.0 | 70  | 140 | 45.7     |
| 17  | 5.5 | 100 | 200 | 36.9     |
| 18  | 7.0 | 70  | 140 | 62.5     |
| 19  | 5.5 | 100 | 200 | 34.7     |
| 20  | 5.5 | 100 | 99  | 57.8     |
| 21  | 5.5 | 100 | 200 | 27.5     |
| 22  | 7.0 | 130 | 260 | 21.9     |
| 23  | 4.0 | 130 | 260 | 5.4      |

**Table S2.** Analysis of variance table (ANOVA) for response surface model.

| Source                 | Sum of squares | d.f. <sup>a</sup> | Mean square | F-value | p-value<br>Prob> F | Effect <sup>b</sup> |
|------------------------|----------------|-------------------|-------------|---------|--------------------|---------------------|
| Model                  | 4832.622       | 9                 | 536.958     | 25.6135 | <<br>0.0001        | S                   |
| A-A : Adsorbent amount | 1179.963       | 1                 | 1179.96     | 56.2855 | <<br>0.0001        | S (+)               |
| B-B : Sample volume    | 2086.285       | 1                 | 2086.29     | 99.5179 | <<br>0.0001        | S (-)               |
| C-C: Eluent volume     | 969.8208       | 1                 | 969.821     | 46.2615 | <<br>0.0001        | S (-)               |
| AB                     | 26.43665       | 1                 | 26.4367     | 1.26106 | 0.2818             | NS                  |
| AC                     | 24.42486       | 1                 | 24.4249     | 1.16509 | 0.3000             | NS                  |
| BC                     | 238.268        | 1                 | 238.268     | 11.3656 | 0.0050             | S (+)               |
| A <sup>2</sup>         | 0.013958       | 1                 | 0.01396     | 0.00067 | 0.9798             | NS                  |
| B <sup>2</sup>         | 178.2485       | 1                 | 178.248     | 8.50264 | 0.0120             | S (-)               |
| C <sup>2</sup>         | 127.0623       | 1                 | 127.062     | 6.061   | 0.0286             | S (+)               |
| Residual               | 272.5308       | 13                | 20.9639     |         |                    |                     |
| Lack of Fit            | 170.6215       | 5                 | 34.1243     | 2.6788  | 0.1038             | NS                  |
| Pure Error             | 101.9093       | 8                 | 12.7387     |         |                    |                     |
| Total Corr.            | 5105.153       | 22                |             |         |                    |                     |

<sup>a</sup> Degree of freedom

<sup>b</sup> S(+): significant with positive effect, S(-): significant with negative effect, NS: not significant

F-value of the model ( $F_{\text{model}} = 25.6135$ ) was much greater than the critical F-value with the same number of degrees of freedom ( $F_{0.05 (9,13)} = 2.71$ ), indicating that the treatment differences are highly significant.
